# Supplementary material for: Reactivity comparison of five-and six-membered cyclometalated platinum(ii) complexes in oxidative addition reactions
Source: Royal Society of Chemistry journal article supplement (doi:10.1039/c5ra17421j), 2015-01-01
Supplement: c5ra17421j1.pdf [file c5ra17421j1.pdf]

## Supporting Information

### Reactivity comparison of five- and six-membered cycloplatinated(II) complexes in oxidative addition reactions

The Cartesian coordinates (in angstroms) for all optimized species discussed in the present work

2

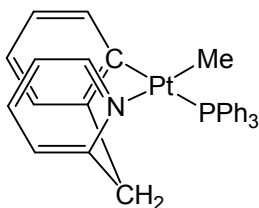

|    |             |             |             |
|----|-------------|-------------|-------------|
| Pt | 0.88563400  | -0.71135600 | -0.02981500 |
| C  | 0.35926000  | -2.69632800 | -0.26977900 |
| H  | 1.23752300  | -3.34732700 | -0.29056700 |
| H  | -0.29857200 | -3.02525100 | 0.54692600  |
| H  | -0.19181200 | -2.83641000 | -1.20868700 |
| C  | 2.86436400  | -1.25180600 | 0.00658600  |
| C  | 3.78968800  | -0.48561800 | -0.73943100 |
| C  | 3.38516600  | -2.31503000 | 0.76729800  |
| C  | 5.15648900  | -0.79186500 | -0.73083600 |
| C  | 4.75187100  | -2.61687800 | 0.78553100  |
| H  | 2.71157200  | -2.92932300 | 1.36000500  |
| C  | 5.64439200  | -1.86030700 | 0.02547100  |
| H  | 5.84543300  | -0.18986600 | -1.32141200 |
| H  | 5.11582700  | -3.44502000 | 1.39042200  |
| H  | 6.70667400  | -2.09204200 | 0.02364700  |
| C  | 1.19045100  | 2.26019600  | 1.10218500  |
| C  | 2.72666100  | 1.76296100  | -0.57191500 |
| C  | 1.70712100  | 3.53909400  | 1.27786800  |
| H  | 0.35932200  | 1.90658200  | 1.70005500  |
| C  | 3.28722700  | 3.03879900  | -0.45327200 |
| C  | 2.77478300  | 3.94045400  | 0.47589600  |
| H  | 1.27620800  | 4.19673200  | 2.02513500  |
| H  | 4.12455400  | 3.31037800  | -1.08786600 |
| H  | 3.20438900  | 4.93286400  | 0.57591700  |
| N  | 1.67509100  | 1.39073900  | 0.19494000  |
| C  | 3.29930800  | 0.72927400  | -1.51578900 |
| P  | -1.46308000 | -0.08247200 | -0.04225700 |
| C  | -2.68256500 | -1.44786100 | -0.31445400 |
| C  | -3.44737100 | -1.99798000 | 0.72329900  |
| C  | -2.80022800 | -1.99404000 | -1.60460600 |
| C  | -4.31432600 | -3.06697500 | 0.47634100  |
| H  | -3.37600900 | -1.59417900 | 1.72782700  |
| C  | -3.66906800 | -3.05661000 | -1.85022900 |
| H  | -2.21608200 | -1.58302100 | -2.42350800 |
| C  | -4.42870400 | -3.59805600 | -0.80868600 |

|   |             |             |             |
|---|-------------|-------------|-------------|
| H | -4.90209300 | -3.47892400 | 1.29223100  |
| H | -3.75086200 | -3.46327300 | -2.85451500 |
| H | -5.10412700 | -4.42740300 | -0.99958900 |
| C | -1.97600100 | 0.63031200  | 1.58860400  |
| C | -1.41513900 | 0.06206900  | 2.74768900  |
| C | -2.87066400 | 1.70230400  | 1.72815700  |
| C | -1.75702500 | 0.54226600  | 4.01326400  |
| H | -0.69918900 | -0.75045300 | 2.65363200  |
| C | -3.20301100 | 2.18812000  | 2.99527200  |
| H | -3.30676600 | 2.16765800  | 0.85072100  |
| C | -2.65139500 | 1.60831700  | 4.13962900  |
| H | -1.31720100 | 0.08943400  | 4.89751900  |
| H | -3.89324900 | 3.02250100  | 3.08537000  |
| H | -2.91131600 | 1.98870100  | 5.12359800  |
| C | -2.00287000 | 1.15542800  | -1.30494100 |
| C | -1.03568100 | 1.92022200  | -1.97458600 |
| C | -3.35866100 | 1.34735800  | -1.62797000 |
| C | -1.41291200 | 2.86427100  | -2.93334500 |
| H | 0.01455900  | 1.76975200  | -1.75081600 |
| C | -3.73427600 | 2.29178400  | -2.58388400 |
| H | -4.12362900 | 0.75037200  | -1.14078500 |
| C | -2.76170800 | 3.05369600  | -3.23782600 |
| H | -0.65062200 | 3.44520700  | -3.44514300 |
| H | -4.78572500 | 2.42795200  | -2.82153100 |
| H | -3.05516900 | 3.78517700  | -3.98572600 |
| H | 2.52011900  | 0.43129500  | -2.22974600 |
| H | 4.11631200  | 1.18016100  | -2.08753400 |

### TS1

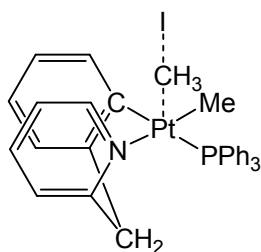

|    |             |             |             |
|----|-------------|-------------|-------------|
| Pt | -0.32231000 | -0.76545900 | -0.71565400 |
| C  | -0.18590700 | -0.09297700 | -2.66604300 |
| H  | -1.13193000 | -0.20941700 | -3.19959000 |
| H  | 0.11785000  | 0.95857100  | -2.70341900 |
| H  | 0.57563100  | -0.68308900 | -3.19253600 |
| C  | -1.93014600 | -1.93650400 | -1.24369600 |
| C  | -1.94841700 | -3.26937500 | -0.77307700 |
| C  | -3.01744000 | -1.51907100 | -2.03075700 |
| C  | -3.00318100 | -4.13079300 | -1.10311100 |
| C  | -4.07318500 | -2.37797500 | -2.35461300 |
| H  | -3.05571800 | -0.50036800 | -2.40601600 |
| C  | -4.06581500 | -3.69473700 | -1.89644000 |
| H  | -2.99119000 | -5.15458300 | -0.73361800 |
| H  | -4.89706800 | -2.01414500 | -2.96426300 |
| H  | -4.87703400 | -4.37384300 | -2.14551300 |
| C  | -0.57923300 | -0.93564500 | 2.48321700  |

|   |             |             |             |
|---|-------------|-------------|-------------|
| C | -0.79602600 | -3.00042000 | 1.43438500  |
| C | -0.79257200 | -1.48691500 | 3.74158500  |
| H | -0.39759700 | 0.12621600  | 2.36964400  |
| C | -1.00981100 | -3.62005400 | 2.66916200  |
| C | -1.00804800 | -2.86094100 | 3.83669600  |
| H | -0.78672500 | -0.84777000 | 4.61762400  |
| H | -1.18044100 | -4.69103400 | 2.70265700  |
| H | -1.17557900 | -3.33241300 | 4.80040900  |
| N | -0.57496800 | -1.66791900 | 1.35365100  |
| C | -0.84082200 | -3.77849400 | 0.13845400  |
| P | 1.81976100  | 0.39289000  | -0.14452600 |
| C | 2.60589300  | 1.39120200  | -1.49254500 |
| C | 2.75272200  | 2.78433400  | -1.44358400 |
| C | 3.06540400  | 0.70350800  | -2.63059200 |
| C | 3.33791400  | 3.47439800  | -2.50988800 |
| H | 2.42485700  | 3.34215900  | -0.57388600 |
| C | 3.65377600  | 1.39280000  | -3.68955000 |
| H | 2.97297200  | -0.37708400 | -2.68856500 |
| C | 3.78843100  | 2.78320700  | -3.63435300 |
| H | 3.44452000  | 4.55408300  | -2.45226700 |
| H | 4.00543100  | 0.84346800  | -4.55839500 |
| H | 4.24420200  | 3.32100600  | -4.46092800 |
| C | 1.73676000  | 1.53567500  | 1.30634100  |
| C | 0.84042700  | 2.62130800  | 1.27198300  |
| C | 2.47657300  | 1.31324400  | 2.47854300  |
| C | 0.69964300  | 3.46643000  | 2.37369800  |
| H | 0.25192200  | 2.82059900  | 0.38136300  |
| C | 2.32776400  | 2.15681900  | 3.58277100  |
| H | 3.17026600  | 0.48186900  | 2.53692500  |
| C | 1.44179800  | 3.23403500  | 3.53461200  |
| H | 0.00458300  | 4.29939700  | 2.32324000  |
| H | 2.90864100  | 1.96773300  | 4.48128400  |
| H | 1.32748700  | 3.88714800  | 4.39498900  |
| C | 3.18888000  | -0.77375300 | 0.28096600  |
| C | 2.90497300  | -2.10035900 | 0.63517900  |
| C | 4.52993900  | -0.34905200 | 0.26623600  |
| C | 3.93491600  | -2.98538000 | 0.96596000  |
| H | 1.87822300  | -2.44488100 | 0.65432700  |
| C | 5.55670300  | -1.23233800 | 0.59836300  |
| H | 4.77347800  | 0.67241400  | -0.00886100 |
| C | 5.26155000  | -2.55372800 | 0.94723800  |
| H | 3.69695000  | -4.01094200 | 1.23391700  |
| H | 6.58740200  | -0.88933300 | 0.58158300  |
| H | 6.06310800  | -3.24188600 | 1.20070500  |
| H | 0.13249400  | -3.69476900 | -0.36386200 |
| H | -0.99249200 | -4.83783400 | 0.36505600  |
| C | -1.98360600 | 1.10057200  | -0.19762100 |
| H | -2.79158500 | 0.39060400  | -0.16436800 |
| H | -1.41982200 | 1.31493200  | 0.69345700  |
| H | -1.71447600 | 1.56724400  | -1.13038300 |
| I | -3.63243400 | 3.10735300  | 0.37067000  |

TS2

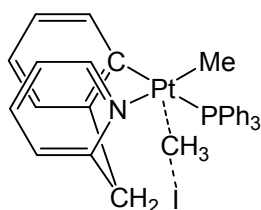

|    |             |             |             |
|----|-------------|-------------|-------------|
| Pt | 0.35997700  | -0.80675900 | -0.69360200 |
| C  | 0.33310900  | 0.07145700  | -2.57298600 |
| H  | 1.34487300  | 0.14928200  | -2.97868000 |
| H  | -0.25995700 | -0.57503400 | -3.23529900 |
| H  | -0.12362900 | 1.06403800  | -2.57090300 |
| C  | 2.04148200  | -1.85595100 | -1.24781100 |
| C  | 3.04230200  | -2.14890100 | -0.29289300 |
| C  | 2.22061000  | -2.36928900 | -2.54545700 |
| C  | 4.17181700  | -2.89902800 | -0.65030900 |
| C  | 3.34209400  | -3.12788600 | -2.89576300 |
| H  | 1.47276500  | -2.17639300 | -3.30891300 |
| C  | 4.33218800  | -3.38585000 | -1.94804700 |
| H  | 4.93264600  | -3.10635900 | 0.09988700  |
| H  | 3.44043700  | -3.51044700 | -3.90925000 |
| H  | 5.21395000  | -3.96500900 | -2.20974900 |
| C  | -0.63959900 | -2.65762700 | 1.71195700  |
| C  | 1.66000400  | -2.32579300 | 1.78618400  |
| C  | -0.61088400 | -3.51896900 | 2.80190100  |
| H  | -1.57281200 | -2.43102100 | 1.21136200  |
| C  | 1.75784000  | -3.17432200 | 2.89407300  |
| C  | 0.61543300  | -3.77602900 | 3.41348900  |
| H  | -1.53153300 | -3.96985800 | 3.15598700  |
| H  | 2.73232200  | -3.35919300 | 3.33371600  |
| H  | 0.68239800  | -4.43730500 | 4.27218800  |
| N  | 0.46256000  | -2.05957300 | 1.21594900  |
| C  | 2.88812200  | -1.71354100 | 1.15700700  |
| P  | -1.77430500 | 0.31736900  | -0.10801500 |
| C  | -2.32068200 | 1.65567000  | -1.25988700 |
| C  | -3.28659700 | 1.44062900  | -2.25286400 |
| C  | -1.69009100 | 2.91095100  | -1.18678800 |
| C  | -3.61762300 | 2.45897200  | -3.15129300 |
| H  | -3.78982500 | 0.48249400  | -2.32836300 |
| C  | -2.02351300 | 3.92539900  | -2.08400700 |
| H  | -0.94551700 | 3.10740000  | -0.42030300 |
| C  | -2.98799400 | 3.70154500  | -3.07081900 |
| H  | -4.37216600 | 2.27699900  | -3.91159400 |
| H  | -1.52927000 | 4.88993900  | -2.01064700 |
| H  | -3.24680400 | 4.49176100  | -3.76983800 |
| C  | -3.14957500 | -0.91651400 | -0.16596100 |
| C  | -3.10820900 | -1.89393000 | -1.17781900 |
| C  | -4.20924500 | -0.93930100 | 0.75441600  |
| C  | -4.11300500 | -2.85766200 | -1.27657200 |
| H  | -2.28432300 | -1.90344200 | -1.88638500 |
| C  | -5.20747900 | -1.91192200 | 0.65897100  |

|   |             |             |             |
|---|-------------|-------------|-------------|
| H | -4.25721400 | -0.20537700 | 1.55177600  |
| C | -5.16424300 | -2.86962000 | -0.35638600 |
| H | -4.06853100 | -3.60226000 | -2.06630400 |
| H | -6.01875200 | -1.91922500 | 1.38158300  |
| H | -5.94201900 | -3.62475800 | -0.42700800 |
| C | -1.91424100 | 1.13924500  | 1.53858900  |
| C | -0.98056800 | 0.84767000  | 2.54495200  |
| C | -2.93633400 | 2.06678700  | 1.81178300  |
| C | -1.06748600 | 1.46267700  | 3.79653600  |
| H | -0.18179100 | 0.14073000  | 2.35148400  |
| C | -3.02360400 | 2.67694200  | 3.06321900  |
| H | -3.65906700 | 2.32231600  | 1.04319200  |
| C | -2.08885200 | 2.37678600  | 4.05811100  |
| H | -0.33200400 | 1.23055900  | 4.56142300  |
| H | -3.81808600 | 3.39174100  | 3.25815500  |
| H | -2.15392000 | 2.85892000  | 5.02940300  |
| H | 2.81671100  | -0.62331800 | 1.23252800  |
| H | 3.76766200  | -2.01142600 | 1.73464400  |
| C | 1.74140100  | 1.27766400  | -0.17011200 |
| H | 1.16546800  | 1.87805400  | -0.85229300 |
| H | 2.62737600  | 0.77945600  | -0.52411600 |
| H | 1.43118700  | 1.19078400  | 0.85772600  |
| I | 3.20223400  | 3.42883200  | 0.49870900  |

**IM1**

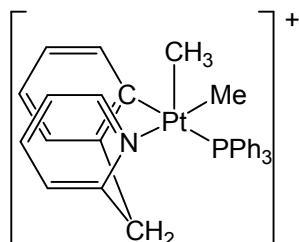

|    |             |             |             |
|----|-------------|-------------|-------------|
| Pt | -0.92641600 | -0.73137200 | -0.18297000 |
| C  | -0.45374300 | -2.73670600 | -0.02204000 |
| H  | -0.32716600 | -2.92163800 | 1.05294400  |
| H  | -1.25800500 | -3.36872100 | -0.39847400 |
| H  | 0.47757100  | -2.96613700 | -0.54175800 |
| C  | -2.92900300 | -1.20138800 | -0.12487400 |
| C  | -3.73004800 | -0.44651700 | 0.75593100  |
| C  | -3.52942200 | -2.22488500 | -0.86968900 |
| C  | -5.09313800 | -0.74742300 | 0.88367300  |
| C  | -4.89099600 | -2.51426900 | -0.73950200 |
| H  | -2.94330500 | -2.81545400 | -1.56682800 |
| C  | -5.67656500 | -1.77744800 | 0.14558400  |
| H  | -5.70227900 | -0.16320800 | 1.56966200  |
| H  | -5.33027500 | -3.31416700 | -1.32962500 |
| H  | -6.73495800 | -1.99500000 | 0.25743600  |
| C  | -1.15088700 | 2.38319200  | -1.07339500 |
| C  | -2.62012800 | 1.80170400  | 0.63662200  |
| C  | -1.63162200 | 3.68669300  | -1.11877200 |
| H  | -0.35393100 | 2.06397600  | -1.73376900 |
| C  | -3.14347200 | 3.09673900  | 0.64829000  |

|   |             |             |             |
|---|-------------|-------------|-------------|
| C | -2.64731800 | 4.05161100  | -0.23659000 |
| H | -1.21229800 | 4.39053300  | -1.82894500 |
| H | -3.93698000 | 3.34354500  | 1.34554700  |
| H | -3.04889400 | 5.06021800  | -0.23848000 |
| N | -1.62868100 | 1.46132200  | -0.21795200 |
| C | -3.15571700 | 0.71931500  | 1.54815800  |
| P | 1.59325400  | -0.09443100 | 0.04152200  |
| C | 2.81623400  | -1.46512900 | -0.13468300 |
| C | 3.77151000  | -1.51376300 | -1.16049700 |
| C | 2.77907700  | -2.50962400 | 0.80815100  |
| C | 4.66305300  | -2.58675400 | -1.24606600 |
| H | 3.83929700  | -0.71435400 | -1.88908800 |
| C | 3.67381300  | -3.57509700 | 0.72226800  |
| H | 2.06106800  | -2.48680300 | 1.62232000  |
| C | 4.61623600  | -3.61906100 | -0.30902000 |
| H | 5.39881800  | -2.60629200 | -2.04487000 |
| H | 3.63427100  | -4.36966700 | 1.46171900  |
| H | 5.31191200  | -4.45038200 | -0.37681100 |
| C | 2.15703800  | 1.22941300  | -1.10901500 |
| C | 2.08384900  | 1.02022300  | -2.49973200 |
| C | 2.59722100  | 2.47473900  | -0.63413000 |
| C | 2.45367600  | 2.02996100  | -3.38934200 |
| H | 1.74978000  | 0.06650600  | -2.89632300 |
| C | 2.95890700  | 3.48499800  | -1.52873800 |
| H | 2.65944800  | 2.66158000  | 0.43216400  |
| C | 2.88849600  | 3.26684200  | -2.90537700 |
| H | 2.39948800  | 1.84899100  | -4.45882000 |
| H | 3.29815000  | 4.44261800  | -1.14444800 |
| H | 3.17119700  | 4.05391000  | -3.59823100 |
| C | 1.93832900  | 0.55699400  | 1.73015700  |
| C | 0.91115800  | 1.16419700  | 2.47008600  |
| C | 3.22539400  | 0.47967600  | 2.29131100  |
| C | 1.16120800  | 1.67845100  | 3.74420800  |
| H | -0.08525600 | 1.25086700  | 2.05211200  |
| C | 3.47221300  | 0.99443800  | 3.56414200  |
| H | 4.03476800  | 0.01442100  | 1.73846600  |
| C | 2.44112000  | 1.59204500  | 4.29409400  |
| H | 0.35488600  | 2.14268900  | 4.30451600  |
| H | 4.47094900  | 0.92691700  | 3.98558500  |
| H | 2.63551200  | 1.98783800  | 5.28670400  |
| H | -2.35055100 | 0.37453800  | 2.21353700  |
| H | -3.92602400 | 1.14637800  | 2.19501200  |
| C | -0.92036600 | -0.89755200 | -2.23903000 |
| H | -0.55616000 | 0.05813900  | -2.61678800 |
| H | -0.25018700 | -1.71402500 | -2.51028200 |
| H | -1.93505400 | -1.08731500 | -2.58275200 |

**IM2**

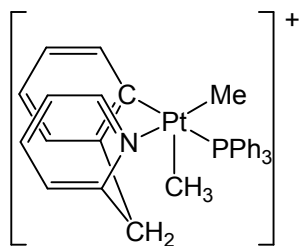

|    |             |             |             |
|----|-------------|-------------|-------------|
| Pt | 0.91336600  | -0.68847000 | -0.05768700 |
| C  | 0.40787600  | -2.69792200 | 0.04042200  |
| H  | 1.18935100  | -3.31147300 | -0.40918000 |
| H  | 0.32514600  | -2.92360300 | 1.11153000  |
| H  | -0.54668300 | -2.89843100 | -0.44572900 |
| C  | 2.91214600  | -1.17268500 | 0.01975000  |
| C  | 3.86742700  | -0.36884200 | -0.63691000 |
| C  | 3.36186000  | -2.25242300 | 0.79463900  |
| C  | 5.22992300  | -0.67754500 | -0.51932800 |
| C  | 4.72470500  | -2.54251200 | 0.91595600  |
| H  | 2.65284500  | -2.88312600 | 1.32036000  |
| C  | 5.66349600  | -1.76109300 | 0.24502100  |
| H  | 5.96001600  | -0.05379500 | -1.03006200 |
| H  | 5.04368700  | -3.38199100 | 1.52814100  |
| H  | 6.72408100  | -1.98374100 | 0.32108200  |
| C  | 1.05988300  | 2.35044100  | 0.97035000  |
| C  | 2.76978400  | 1.88404800  | -0.54036000 |
| C  | 1.52654600  | 3.63994400  | 1.19130800  |
| H  | 0.18251500  | 1.98368400  | 1.48891100  |
| C  | 3.28157700  | 3.17435600  | -0.37445200 |
| C  | 2.65689000  | 4.06488300  | 0.49456400  |
| H  | 1.00997300  | 4.28693600  | 1.89148100  |
| H  | 4.17244700  | 3.46466900  | -0.92095300 |
| H  | 3.05111400  | 5.06702000  | 0.63203000  |
| N  | 1.65352200  | 1.49221600  | 0.11555600  |
| C  | 3.46886400  | 0.87246900  | -1.41880300 |
| P  | -1.58693700 | -0.05475800 | -0.00634500 |
| C  | -2.73249400 | -1.46821500 | -0.29850400 |
| C  | -3.37120000 | -2.13558100 | 0.75680600  |
| C  | -2.91258100 | -1.93857200 | -1.61242700 |
| C  | -4.17677800 | -3.24866800 | 0.50281100  |
| H  | -3.25172200 | -1.78875000 | 1.77776500  |
| C  | -3.71832800 | -3.04975300 | -1.86070700 |
| H  | -2.44168100 | -1.42881200 | -2.44815400 |
| C  | -4.35127500 | -3.70884100 | -0.80306200 |
| H  | -4.67038200 | -3.75115700 | 1.32967500  |
| H  | -3.85331000 | -3.39742300 | -2.88079500 |
| H  | -4.97910900 | -4.57342600 | -0.99771500 |
| C  | -2.00383800 | 0.56396200  | 1.67967500  |
| C  | -1.40039500 | -0.05941400 | 2.78843700  |
| C  | -2.87864700 | 1.64014400  | 1.89795400  |
| C  | -1.68074700 | 0.37399700  | 4.08515700  |
| H  | -0.71211900 | -0.88846100 | 2.64627600  |
| C  | -3.14975300 | 2.07546700  | 3.19688800  |

|   |             |             |             |
|---|-------------|-------------|-------------|
| H | -3.34764900 | 2.14309900  | 1.05912000  |
| C | -2.55507700 | 1.44388000  | 4.29122800  |
| H | -1.21164400 | -0.12068800 | 4.93059600  |
| H | -3.82714900 | 2.91037700  | 3.35103400  |
| H | -2.76811500 | 1.78592900  | 5.29979100  |
| C | -2.17836200 | 1.22659200  | -1.18588400 |
| C | -1.26709800 | 2.11495700  | -1.77815300 |
| C | -3.54612600 | 1.34771600  | -1.49374300 |
| C | -1.71226500 | 3.10596700  | -2.65592900 |
| H | -0.20932500 | 2.03849100  | -1.55505600 |
| C | -3.98705000 | 2.34062100  | -2.36857400 |
| H | -4.26700000 | 0.66451700  | -1.05628300 |
| C | -3.07136000 | 3.22088100  | -2.95165700 |
| H | -0.99485600 | 3.78371800  | -3.10928200 |
| H | -5.04575200 | 2.42359000  | -2.59624400 |
| H | -3.41693600 | 3.99026200  | -3.63598800 |
| H | 2.81839800  | 0.61580700  | -2.26189200 |
| H | 4.35868900  | 1.33909700  | -1.84890700 |
| C | 0.85107400  | -1.00564000 | -2.10609000 |
| H | 0.70575300  | -0.02335700 | -2.55798400 |
| H | 1.79016200  | -1.46254100 | -2.41579600 |
| H | 0.01407000  | -1.66565100 | -2.33024600 |

**IM1'**

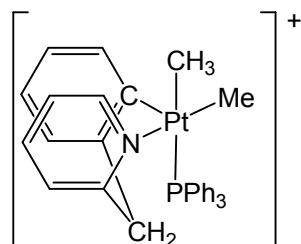

|    |             |             |             |
|----|-------------|-------------|-------------|
| Pt | -0.86038700 | -0.27745700 | -1.19201300 |
| C  | 0.11077700  | -1.81262900 | -2.19449100 |
| H  | 0.52181200  | -2.54525200 | -1.49593800 |
| H  | -0.55970300 | -2.31148000 | -2.89748800 |
| H  | 0.92563100  | -1.34075000 | -2.75530100 |
| C  | -2.01111800 | -1.53526700 | -0.09194500 |
| C  | -2.46831700 | -1.11108500 | 1.16934200  |
| C  | -2.35931600 | -2.79804400 | -0.58264300 |
| C  | -3.26471500 | -1.99769000 | 1.91426300  |
| C  | -3.14708200 | -3.66158100 | 0.18322100  |
| H  | -2.02031500 | -3.12590300 | -1.55594400 |
| C  | -3.60277200 | -3.26190800 | 1.43786200  |
| H  | -3.61751900 | -1.67885600 | 2.89184100  |
| H  | -3.40075700 | -4.64096200 | -0.21260100 |
| H  | -4.21860100 | -3.92328800 | 2.03999600  |
| C  | -2.20695100 | 2.54474100  | -1.08456200 |
| C  | -2.46852200 | 1.42896000  | 0.94507300  |
| C  | -2.96416600 | 3.62607500  | -0.65345000 |
| H  | -1.77787100 | 2.52030600  | -2.08083000 |
| C  | -3.25242900 | 2.47727800  | 1.43617200  |
| C  | -3.50316200 | 3.58695300  | 0.63358500  |



|   |             |             |             |
|---|-------------|-------------|-------------|
| H | -3.13012300 | 4.46854400  | -1.31550100 |
| H | -3.65531800 | 2.41509300  | 2.44133800  |
| H | -4.10955900 | 4.40718900  | 1.00497300  |
| N | -1.96378200 | 1.47422500  | -0.30311100 |
| C | -2.12226400 | 0.22861100  | 1.78993800  |
| H | -1.04624300 | 0.27345200  | 2.00641900  |
| H | -2.62959500 | 0.31823500  | 2.75345900  |
| C | -2.35014200 | -0.33126400 | -2.64970600 |
| H | -1.93976000 | 0.27225900  | -3.47044400 |
| H | -2.55193600 | -1.34384200 | -2.99934000 |
| H | -3.26685600 | 0.12134200  | -2.26648500 |
| P | 1.35192100  | 0.05640700  | 0.21155200  |
| C | 2.60735000  | 0.61768500  | -1.02842500 |
| C | 3.25727000  | -0.33157300 | -1.83895900 |
| C | 2.86050700  | 1.98044900  | -1.25326000 |
| C | 4.13573800  | 0.07494400  | -2.84401600 |
| H | 3.09578000  | -1.39206000 | -1.67795600 |
| C | 3.73772300  | 2.38287400  | -2.26298900 |
| H | 2.39089600  | 2.73735300  | -0.63533700 |
| C | 4.37564200  | 1.43354000  | -3.06284300 |
| H | 4.63439700  | -0.67357200 | -3.45308200 |
| H | 3.92489000  | 3.44183000  | -2.41654500 |
| H | 5.05854000  | 1.74851700  | -3.84645100 |
| C | 2.08563000  | -1.44625200 | 0.97004500  |
| C | 3.47103100  | -1.55853600 | 1.18766800  |
| C | 1.24250500  | -2.49040200 | 1.38238100  |
| C | 3.99728700  | -2.69406900 | 1.80329200  |
| H | 4.13985200  | -0.76326600 | 0.87394900  |
| C | 1.77427400  | -3.62498300 | 2.00003900  |
| H | 0.17165600  | -2.42391500 | 1.22100800  |
| C | 3.15023500  | -3.72901800 | 2.20989400  |
| H | 5.06874400  | -2.76966800 | 1.96434800  |
| H | 1.11152400  | -4.42683800 | 2.31190400  |
| H | 3.56324200  | -4.61331600 | 2.68656600  |
| C | 1.38767000  | 1.33881800  | 1.54022700  |
| C | 2.01128100  | 1.10853300  | 2.77749100  |
| C | 0.76638000  | 2.58134000  | 1.31642500  |
| C | 2.02318000  | 2.10195600  | 3.75899800  |
| H | 2.49014300  | 0.15738900  | 2.98052200  |
| C | 0.79037600  | 3.57488400  | 2.29598200  |
| H | 0.26031100  | 2.77962700  | 0.37756900  |
| C | 1.41796200  | 3.33703700  | 3.52089500  |
| H | 2.51024100  | 1.90686700  | 4.71007700  |
| H | 0.31186800  | 4.53047100  | 2.10211400  |
| H | 1.43129900  | 4.10817000  | 4.28563000  |

**IM2'**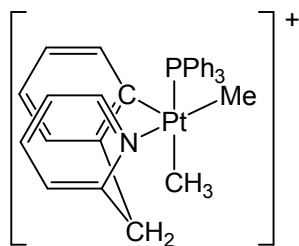

|    |             |             |             |
|----|-------------|-------------|-------------|
| Pt | -0.75425000 | 0.20252800  | -1.39091100 |
| C  | 0.19711200  | 1.64366800  | -2.54525500 |
| H  | -0.52193100 | 2.37515000  | -2.91996900 |
| H  | 0.98846700  | 2.14964600  | -1.99070300 |
| H  | 0.63809700  | 1.10177400  | -3.39221100 |
| C  | -1.72221600 | 1.57649100  | -0.26615800 |
| C  | -2.99104700 | 1.28206800  | 0.26164500  |
| C  | -1.08333000 | 2.78148000  | 0.04249500  |
| C  | -3.57175100 | 2.22157400  | 1.13184100  |
| C  | -1.69058200 | 3.70114300  | 0.90241600  |
| H  | -0.10742400 | 3.01162000  | -0.36193800 |
| C  | -2.93920100 | 3.42055400  | 1.45279900  |
| H  | -4.54823700 | 1.99941200  | 1.55493600  |
| H  | -1.17639800 | 4.62932700  | 1.13497400  |
| H  | -3.41977600 | 4.12663000  | 2.12337000  |
| C  | -1.28183400 | -2.68863000 | -0.21836800 |
| C  | -3.10793700 | -1.29414500 | 0.14734800  |
| C  | -1.90675700 | -3.76966500 | 0.38880800  |
| H  | -0.28059300 | -2.78573100 | -0.62189100 |
| C  | -3.78609800 | -2.33613500 | 0.78870100  |
| C  | -3.18621500 | -3.58577200 | 0.91178800  |
| H  | -1.39366600 | -4.72253600 | 0.45458900  |
| H  | -4.78251200 | -2.15877900 | 1.17907800  |
| H  | -3.70721200 | -4.39975900 | 1.40617400  |
| N  | -1.86244800 | -1.47837300 | -0.33737900 |
| C  | -3.78994700 | 0.03771500  | -0.07171400 |
| H  | -4.10403400 | 0.08066200  | -1.12235100 |
| H  | -4.71231000 | 0.04576100  | 0.51411100  |
| P  | 1.28050900  | -0.07829700 | 0.21124200  |
| C  | 2.55168300  | -1.20110600 | -0.50949300 |
| C  | 2.25111400  | -2.00735300 | -1.61998600 |
| C  | 3.84302400  | -1.27178300 | 0.04633100  |
| C  | 3.21022900  | -2.87383100 | -2.15135800 |
| H  | 1.27457700  | -1.96824600 | -2.09390400 |
| C  | 4.79770100  | -2.13867400 | -0.48461900 |
| H  | 4.10564300  | -0.64477200 | 0.89278900  |
| C  | 4.48246700  | -2.94342400 | -1.58316700 |
| H  | 2.96047700  | -3.48810400 | -3.01143500 |
| H  | 5.78824600  | -2.18303600 | -0.04145600 |
| H  | 5.22785200  | -3.61632700 | -1.99689200 |
| C  | 0.83093400  | -0.79293600 | 1.84906000  |
| C  | 1.51236500  | -1.87933700 | 2.41953800  |
| C  | -0.25637500 | -0.23084800 | 2.54325500  |
| C  | 1.12395200  | -2.38080700 | 3.66419600  |

|   |             |             |             |
|---|-------------|-------------|-------------|
| H | 2.34398800  | -2.34083600 | 1.89898800  |
| C | -0.63263500 | -0.72793700 | 3.79146000  |
| H | -0.81324600 | 0.59420300  | 2.11101500  |
| C | 0.05641600  | -1.80473300 | 4.35488500  |
| H | 1.66045800  | -3.22273200 | 4.09229400  |
| H | -1.46839600 | -0.27686200 | 4.31863000  |
| H | -0.24054600 | -2.19492600 | 5.32411900  |
| C | 2.23974700  | 1.45114800  | 0.58619300  |
| C | 2.10618000  | 2.13861200  | 1.80185000  |
| C | 3.08901300  | 1.97827000  | -0.40456900 |
| C | 2.80702200  | 3.32698700  | 2.02141600  |
| H | 1.46761500  | 1.74699900  | 2.58598800  |
| C | 3.78669800  | 3.16548000  | -0.18017400 |
| H | 3.22610600  | 1.45307600  | -1.34503200 |
| C | 3.64585500  | 3.84428500  | 1.03291100  |
| H | 2.69882400  | 3.84320600  | 2.97098500  |
| H | 4.44379400  | 3.55509900  | -0.95231400 |
| H | 4.19120800  | 4.76718900  | 1.20755700  |
| C | -2.21083000 | 0.26633100  | -2.89378000 |
| H | -2.84163700 | -0.62188400 | -2.80837000 |
| H | -2.81528200 | 1.17488000  | -2.84354800 |
| H | -1.66972900 | 0.24364600  | -3.84525200 |

#### 4-cis-anti

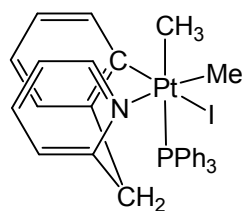

|    |             |             |             |
|----|-------------|-------------|-------------|
| Pt | 0.84375000  | -0.36995600 | -0.96807400 |
| C  | -0.13261600 | 0.12134500  | -2.73833700 |
| H  | -0.29045600 | 1.20172600  | -2.79552800 |
| H  | 0.46645900  | -0.20343400 | -3.59319400 |
| H  | -1.09000600 | -0.40018400 | -2.75713400 |
| C  | 2.02909700  | 1.31671100  | -1.09320800 |
| C  | 2.56528300  | 1.90256700  | 0.07163200  |
| C  | 2.38505800  | 1.86012300  | -2.33634700 |
| C  | 3.42902000  | 3.00388400  | -0.04280300 |
| C  | 3.23815000  | 2.96252700  | -2.43660900 |
| H  | 1.99783400  | 1.42560400  | -3.25055100 |
| C  | 3.76724500  | 3.54066100  | -1.28373300 |
| H  | 3.83409500  | 3.44831800  | 0.86379800  |
| H  | 3.48806600  | 3.35957900  | -3.41740900 |
| H  | 4.43506300  | 4.39546000  | -1.34633100 |
| C  | 2.36589700  | -2.26040600 | 1.11114600  |
| C  | 2.57332900  | -0.02876000 | 1.72102200  |
| C  | 3.19889500  | -2.67896200 | 2.14214100  |
| H  | 1.91700800  | -2.97095500 | 0.42762700  |
| C  | 3.42088300  | -0.38045800 | 2.77684700  |
| C  | 3.73808500  | -1.71779800 | 2.99564900  |

|   |             |             |             |
|---|-------------|-------------|-------------|
| H | 3.41493000  | -3.73504100 | 2.26274800  |
| H | 3.82335700  | 0.39890400  | 3.41537200  |
| H | 4.39467500  | -2.00229400 | 3.81251800  |
| N | 2.05105900  | -0.96747100 | 0.90423600  |
| C | 2.21432400  | 1.41328600  | 1.46352300  |
| H | 1.13885400  | 1.53474400  | 1.64246900  |
| H | 2.71809400  | 2.03719000  | 2.20683600  |
| I | -0.57660900 | -2.97530300 | -1.02590400 |
| C | 2.40710800  | -1.27128500 | -2.04550100 |
| H | 2.20926500  | -2.34361000 | -2.07728200 |
| H | 2.44651800  | -0.86599000 | -3.05792700 |
| H | 3.34968600  | -1.06957100 | -1.53208400 |
| P | -1.23933500 | 0.61793300  | 0.34177100  |
| C | -2.88789700 | -0.04617100 | -0.18551500 |
| C | -3.40523300 | 0.37073200  | -1.42450300 |
| C | -3.64026700 | -0.93337500 | 0.59574300  |
| C | -4.63947200 | -0.09893400 | -1.87335800 |
| H | -2.85418600 | 1.07657000  | -2.03776000 |
| C | -4.87867100 | -1.39886500 | 0.14558800  |
| H | -3.27010100 | -1.26357600 | 1.55970700  |
| C | -5.38026700 | -0.98755100 | -1.08972700 |
| H | -5.02338200 | 0.23465100  | -2.83350900 |
| H | -5.44966600 | -2.08356900 | 0.76670500  |
| H | -6.34277000 | -1.35163500 | -1.43816700 |
| C | -1.59432700 | 2.43365600  | 0.24096500  |
| C | -2.81332700 | 2.94733700  | 0.72532000  |
| C | -0.67762000 | 3.31650900  | -0.34603600 |
| C | -3.09378800 | 4.30995300  | 0.64007000  |
| H | -3.54757200 | 2.27914200  | 1.16483100  |
| C | -0.96405700 | 4.68273000  | -0.43638800 |
| H | 0.25752700  | 2.94229900  | -0.74269700 |
| C | -2.16808300 | 5.18232100  | 0.05808700  |
| H | -4.03741100 | 4.68975400  | 1.02189200  |
| H | -0.24271200 | 5.35079700  | -0.89859100 |
| H | -2.39042700 | 6.24342800  | -0.01355500 |
| C | -1.15539700 | 0.25351300  | 2.15474100  |
| C | -1.31114900 | 1.24059700  | 3.14126400  |
| C | -0.87797600 | -1.06619700 | 2.55761300  |
| C | -1.20400800 | 0.91394700  | 4.49565700  |
| H | -1.51178400 | 2.26846600  | 2.86122100  |
| C | -0.78630600 | -1.39029900 | 3.91192700  |
| H | -0.73560300 | -1.84156000 | 1.81044700  |
| C | -0.94700700 | -0.40112100 | 4.88559400  |
| H | -1.32511000 | 1.69231900  | 5.24406800  |
| H | -0.58097000 | -2.41653100 | 4.20374300  |
| H | -0.86833200 | -0.65338200 | 5.93945500  |

**4-trans-anti**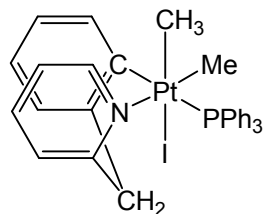

|    |             |             |             |
|----|-------------|-------------|-------------|
| Pt | -0.86786700 | -0.19249000 | -0.63535900 |
| C  | -0.47927500 | -1.88454300 | -1.78253700 |
| H  | -1.32218200 | -2.56954900 | -1.68981600 |
| H  | -0.34177900 | -1.60607800 | -2.83205200 |
| H  | 0.42161200  | -2.37560900 | -1.41671800 |
| C  | -2.88895500 | -0.39539300 | -1.02522500 |
| C  | -3.84459300 | 0.03855900  | -0.08392200 |
| C  | -3.34809900 | -0.90396400 | -2.24948900 |
| C  | -5.21214900 | -0.07853100 | -0.38205700 |
| C  | -4.71119300 | -1.01903500 | -2.53422400 |
| H  | -2.63812400 | -1.21759300 | -3.00673300 |
| C  | -5.65378400 | -0.60899800 | -1.59274300 |
| H  | -5.93935700 | 0.25369400  | 0.35595500  |
| H  | -5.02839100 | -1.42392800 | -3.49231000 |
| H  | -6.71776700 | -0.69121400 | -1.79822000 |
| C  | -0.64121100 | 2.85126500  | 0.39393900  |
| C  | -2.59501500 | 1.85693500  | 1.16206400  |
| C  | -0.97567100 | 4.08179700  | 0.94357900  |
| H  | 0.28453300  | 2.73267000  | -0.15542200 |
| C  | -2.99379100 | 3.06872600  | 1.74052700  |
| C  | -2.18118400 | 4.19231400  | 1.63647300  |
| H  | -0.30414200 | 4.92514400  | 0.82507200  |
| H  | -3.94237800 | 3.11538600  | 2.26488800  |
| H  | -2.48357800 | 5.13528200  | 2.08209900  |
| N  | -1.42000300 | 1.75663600  | 0.50285000  |
| C  | -3.45943500 | 0.62844200  | 1.26026100  |
| P  | 1.72599000  | 0.05821500  | -0.19269500 |
| C  | 2.78601000  | -1.40427700 | -0.62097300 |
| C  | 3.84214900  | -1.35163600 | -1.54328300 |
| C  | 2.53484700  | -2.61596400 | 0.04873200  |
| C  | 4.61942600  | -2.48539600 | -1.79854600 |
| H  | 4.07576600  | -0.42991700 | -2.06280400 |
| C  | 3.31529600  | -3.74340700 | -0.20665900 |
| H  | 1.72416800  | -2.68009100 | 0.76828100  |
| C  | 4.35872400  | -3.68379100 | -1.13405200 |
| H  | 5.43336000  | -2.42319400 | -2.51569300 |
| H  | 3.10406400  | -4.66964700 | 0.32054000  |
| H  | 4.96457200  | -4.56328600 | -1.33368200 |
| C  | 2.48069000  | 1.44366100  | -1.16094100 |
| C  | 2.43725100  | 1.40191900  | -2.56774200 |
| C  | 3.04659100  | 2.57011800  | -0.54185900 |
| C  | 2.96520500  | 2.44460700  | -3.32950300 |
| H  | 1.99666300  | 0.54807300  | -3.07392800 |
| C  | 3.56217100  | 3.61984000  | -1.30749600 |
| H  | 3.09344000  | 2.63138300  | 0.53983500  |

|   |             |             |             |
|---|-------------|-------------|-------------|
| C | 3.52744100  | 3.55897800  | -2.70090100 |
| H | 2.93114600  | 2.38741800  | -4.41375500 |
| H | 3.99678100  | 4.48164400  | -0.80874100 |
| H | 3.93348800  | 4.37317500  | -3.29439500 |
| C | 2.26063200  | 0.40438500  | 1.54253700  |
| C | 1.33079300  | 0.81396800  | 2.50805500  |
| C | 3.61193500  | 0.27414500  | 1.91004700  |
| C | 1.74386100  | 1.09978200  | 3.81234500  |
| H | 0.28196400  | 0.88684800  | 2.24976100  |
| C | 4.02127000  | 0.55742900  | 3.21271100  |
| H | 4.34555400  | -0.05238500 | 1.17933100  |
| C | 3.08728200  | 0.97259000  | 4.16675900  |
| H | 1.01053100  | 1.41078600  | 4.55104700  |
| H | 5.06808600  | 0.45018800  | 3.48303200  |
| H | 3.40650800  | 1.18898100  | 5.18255200  |
| H | -2.91161800 | -0.12555000 | 1.84034100  |
| H | -4.36266800 | 0.87928400  | 1.82314500  |
| C | -0.84594900 | 1.04605400  | -2.32257000 |
| H | -0.65182600 | 0.44990800  | -3.21628200 |
| H | -1.81794800 | 1.53322700  | -2.40681900 |
| H | -0.06212200 | 1.79295500  | -2.19765700 |
| I | -1.01909800 | -2.13220700 | 1.66901500  |

#### 4-*cis-syn*

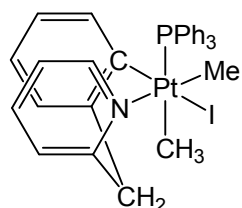

|    |             |             |             |
|----|-------------|-------------|-------------|
| Pt | -0.94513300 | -0.18813100 | -0.99343200 |
| C  | -0.01251300 | -0.41021700 | -2.83970500 |
| H  | -0.47482700 | 0.25433700  | -3.57350100 |
| H  | 1.05046600  | -0.17302500 | -2.76185600 |
| H  | -0.13244400 | -1.44883800 | -3.15346200 |
| C  | -1.00908700 | 1.85980600  | -1.21536600 |
| C  | -2.05610900 | 2.60404900  | -0.62881800 |
| C  | -0.03086700 | 2.54763100  | -1.94654000 |
| C  | -2.05381000 | 4.00411000  | -0.75163600 |
| C  | -0.05256000 | 3.93950100  | -2.07449400 |
| H  | 0.77440600  | 2.00476100  | -2.42325000 |
| C  | -1.06468700 | 4.67764300  | -1.46586000 |
| H  | -2.85928300 | 4.57032900  | -0.28889200 |
| H  | 0.72859200  | 4.43596700  | -2.64442700 |
| H  | -1.09263200 | 5.76066000  | -1.54996700 |
| C  | -1.85155500 | -0.86530300 | 1.98920500  |
| C  | -2.95844800 | 1.01564200  | 1.19927200  |
| C  | -2.50453200 | -0.81036700 | 3.21410000  |
| H  | -1.13723700 | -1.64870000 | 1.77410000  |
| C  | -3.64512400 | 1.13532400  | 2.41325800  |
| C  | -3.42399900 | 0.21392600  | 3.43169300  |

|   |             |             |             |
|---|-------------|-------------|-------------|
| H | -2.28753000 | -1.55472500 | 3.97228300  |
| H | -4.35224500 | 1.94808400  | 2.54280700  |
| H | -3.95607200 | 0.29575500  | 4.37487800  |
| N | -2.07253900 | 0.01929500  | 0.99717100  |
| C | -3.24802200 | 1.97679900  | 0.07238700  |
| H | -3.85700900 | 1.44262200  | -0.66741100 |
| H | -3.88675400 | 2.77278500  | 0.46452700  |
| P | 1.42247600  | 0.02929100  | 0.33674000  |
| C | 2.64002300  | -1.36252600 | 0.43438200  |
| C | 2.39627500  | -2.57915100 | -0.21285900 |
| C | 3.87249900  | -1.17680700 | 1.09213000  |
| C | 3.35366000  | -3.59950900 | -0.18916400 |
| H | 1.45795300  | -2.73817600 | -0.73045900 |
| C | 4.82033200  | -2.19738900 | 1.12152300  |
| H | 4.09489400  | -0.23083300 | 1.57703000  |
| C | 4.56217900  | -3.41399900 | 0.47992300  |
| H | 3.14678900  | -4.53751600 | -0.69691400 |
| H | 5.76365000  | -2.04086800 | 1.63750000  |
| H | 5.30459200  | -4.20718400 | 0.49885100  |
| C | 1.13763500  | 0.53507000  | 2.09087600  |
| C | 1.56761300  | -0.23464600 | 3.18302200  |
| C | 0.39160900  | 1.70200500  | 2.34326900  |
| C | 1.28646700  | 0.16769400  | 4.49152400  |
| H | 2.12220800  | -1.15185000 | 3.02146500  |
| C | 0.12390500  | 2.10768400  | 3.65060900  |
| H | 0.00479700  | 2.29072000  | 1.51708800  |
| C | 0.57291800  | 1.34250700  | 4.73029500  |
| H | 1.62976800  | -0.44194600 | 5.32283600  |
| H | -0.44497500 | 3.01693400  | 3.82364200  |
| H | 0.36025300  | 1.65630900  | 5.74845100  |
| C | 2.56426200  | 1.33113400  | -0.34334600 |
| C | 2.76047600  | 2.58941000  | 0.24120200  |
| C | 3.26605900  | 1.02297000  | -1.52373300 |
| C | 3.62648800  | 3.51853700  | -0.34285100 |
| H | 2.25295400  | 2.85429100  | 1.16126200  |
| C | 4.12355200  | 1.95393300  | -2.10956300 |
| H | 3.16358900  | 0.04252900  | -1.97943000 |
| C | 4.30484300  | 3.20890000  | -1.52181800 |
| H | 3.76923100  | 4.48559700  | 0.13170600  |
| H | 4.65567900  | 1.69395100  | -3.02043200 |
| H | 4.97598100  | 3.93338500  | -1.97449700 |
| C | -2.70959200 | -0.31730100 | -2.11981500 |
| H | -3.51660200 | -0.62747300 | -1.45275200 |
| H | -2.92884200 | 0.64749000  | -2.58271200 |
| H | -2.55926600 | -1.07553200 | -2.88805100 |
| I | -1.30902700 | -3.15193200 | -0.77514300 |

#### 4-trans-syn

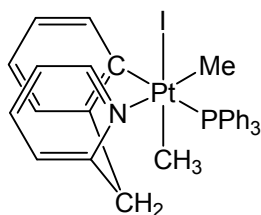

|    |             |             |             |
|----|-------------|-------------|-------------|
| Pt | 0.84421400  | -0.36832100 | -0.55087300 |
| C  | 0.53695300  | -2.25360700 | -1.37668200 |
| H  | 1.21902300  | -2.40415800 | -2.21591500 |
| H  | 0.73155600  | -2.99254200 | -0.59697900 |
| H  | -0.49115900 | -2.34948100 | -1.72621100 |
| C  | 2.86224500  | -0.52402300 | -0.95738800 |
| C  | 3.61311700  | 0.62848300  | -1.26724400 |
| C  | 3.52596500  | -1.75851300 | -0.91181600 |
| C  | 4.99122300  | 0.51043200  | -1.51578500 |
| C  | 4.89483200  | -1.86377100 | -1.16923800 |
| H  | 2.97860500  | -2.65562600 | -0.65081900 |
| C  | 5.63621700  | -0.72345600 | -1.47695400 |
| H  | 5.56112100  | 1.40769800  | -1.74826900 |
| H  | 5.37621600  | -2.83754600 | -1.12037500 |
| H  | 6.70215400  | -0.79033300 | -1.67772100 |
| C  | 0.74200500  | 2.01854600  | 1.58963900  |
| C  | 2.32477700  | 2.44848900  | -0.05673800 |
| C  | 1.07278500  | 3.16997900  | 2.29299300  |
| H  | -0.01813800 | 1.34275400  | 1.95936100  |
| C  | 2.71305100  | 3.61891800  | 0.60568900  |
| C  | 2.08144300  | 3.98990300  | 1.78876500  |
| H  | 0.55306700  | 3.40435600  | 3.21557200  |
| H  | 3.50968700  | 4.22488000  | 0.18697200  |
| H  | 2.37524200  | 4.89624900  | 2.30979800  |
| N  | 1.34028400  | 1.66656500  | 0.43411300  |
| C  | 3.00235000  | 2.01921800  | -1.33543500 |
| P  | -1.79089800 | -0.01177900 | -0.20445600 |
| C  | -2.80744900 | -1.38256700 | -0.92883500 |
| C  | -3.47041500 | -2.33053700 | -0.13599200 |
| C  | -2.86669400 | -1.52015000 | -2.32870400 |
| C  | -4.17097500 | -3.38680700 | -0.72500000 |
| H  | -3.45766600 | -2.24784600 | 0.94448300  |
| C  | -3.57057800 | -2.57241600 | -2.91426900 |
| H  | -2.37946600 | -0.79324200 | -2.97074500 |
| C  | -4.22289200 | -3.51305200 | -2.11327300 |
| H  | -4.68067100 | -4.10710200 | -0.09122400 |
| H  | -3.60815200 | -2.65455600 | -3.99688400 |
| H  | -4.76959000 | -4.33385400 | -2.56870600 |
| C  | -2.48076000 | 0.21611600  | 1.49954600  |
| C  | -2.19579800 | -0.73828900 | 2.49230900  |
| C  | -3.27954000 | 1.32191600  | 1.83776800  |
| C  | -2.71477600 | -0.60053300 | 3.78102200  |
| H  | -1.55124500 | -1.58014200 | 2.26828300  |
| C  | -3.78747400 | 1.46107400  | 3.13114600  |



|   |             |             |             |
|---|-------------|-------------|-------------|
| H | -3.51275400 | 2.07720200  | 1.09630700  |
| C | -3.51130500 | 0.49949400  | 4.10491900  |
| H | -2.48444400 | -1.35077300 | 4.53215700  |
| H | -4.40270000 | 2.32330000  | 3.37329700  |
| H | -3.90968200 | 0.60900700  | 5.10975800  |
| C | -2.43241100 | 1.48163000  | -1.09424400 |
| C | -1.63444400 | 2.63449400  | -1.17350100 |
| C | -3.73165400 | 1.52618300  | -1.62936300 |
| C | -2.11554600 | 3.79623200  | -1.78135800 |
| H | -0.63433200 | 2.63018200  | -0.75692600 |
| C | -4.20970400 | 2.68670600  | -2.24045600 |
| H | -4.37593600 | 0.65588700  | -1.56939700 |
| C | -3.40267100 | 3.82398100  | -2.32072700 |
| H | -1.48069400 | 4.67618600  | -1.83449800 |
| H | -5.21561500 | 2.70059700  | -2.65066100 |
| H | -3.77584200 | 4.72568300  | -2.79814200 |
| H | 2.27354100  | 2.07603300  | -2.15119500 |
| H | 3.78421700  | 2.74606400  | -1.57168000 |
| I | 1.39924000  | -1.56780400 | 2.12147200  |
| C | 0.55130300  | 0.28041700  | -2.52714600 |
| H | 0.24264400  | 1.32688600  | -2.52971000 |
| H | 1.48048500  | 0.15157400  | -3.08478200 |
| H | -0.22546700 | -0.33093600 | -2.98896800 |
